# Supplementary material
Source: MDPI journal article supplement (https://www.mdpi.com/2073-4344/14/1/44)
Supplement: s1 [file s1]

# Improving the Antioxidant Activity, Yield, and Hydrocarbon Content of Bio-Oil from the Pyrolysis of Açaí Seeds by Chemical Activation: Effect of Temperature and Molarity

Flávio Pinheiro Valois <sup>1</sup>, Kelly Christina Alves Bezerra <sup>2</sup>, Fernanda Paula da Costa Assunção <sup>2</sup>, Lucas Pinto Bernar <sup>3</sup>, Simone Patrícia Aranha da Paz <sup>3</sup>, Marcelo Costa Santos <sup>3</sup>, Waldeci Paraguassu Feio <sup>4</sup>, Renan Marcelo Pereira Silva <sup>5</sup>, Neyson Martins Mendonça <sup>5</sup>, Douglas Alberto Rocha de Castro <sup>6</sup>, Sergio Duvoisin Jr. <sup>7</sup>, Antônio Rafael Quadros Gomes <sup>8</sup>, Victor Ricardo Costa Sousa <sup>9</sup>, Marta Chagas Monteiro <sup>8,9</sup>, and Nélcio Teixeira Machado <sup>1,2,3,5,\*</sup>

<sup>1</sup> Graduate Program of Sanitary and Environment Engineering, Campus Profissional-UFPA, Universidade Federal do Pará, Rua Augusto Corrêa N° 1, Belém 66075-110, Brazil; flaviopinheirovalois@hotmail.com

<sup>2</sup> Graduate Program of Civil Engineering, Campus Profissional-UFPA, Universidade Federal do Pará, Rua Corrêa N° 1, Belém 66075-900, Brazil; kelly.bezerra@itec.ufpa.br (K.C.A.B.); fernanda.assuncao.itec@gmail.com (F.P.d.C.A.)

<sup>3</sup> Graduate Program of Natural Resources Engineering of Amazon, Campus Profissional-UFPA, Universidade Federal do Pará, Rua Augusto Corrêa N° 1, Belém 66075-110, Brazil; lucas.bernar7@gmail.com (L.P.B.); paz@ufpa.br (S.P.A.d.P.); marcelo.santos@ufpa.edu.br (M.C.S.)

<sup>4</sup> Faculty of Physics, Campus Básico-UFPA, Universidade Federal do Pará, Rua Corrêa N° 1, Belém 66075-110, Brazil; paraguassu@ufpa.br

<sup>5</sup> Faculty of Sanitary and Environmental Engineering, Campus Profissional-UFPA, Universidade Federal do Pará, Rua Corrêa N° 1, Belém 66075-900, Brazil; renanmarcelo0303@gmail.com (R.M.P.S.); neysonmm@ufpa.br (N.M.M.)

<sup>6</sup> Centro Universitário Luterano de Manaus–CEULM/ULBRA, Avenida Carlos Drummond de Andrade N° 1460, Manaus 69077-730, Brazil; douglascastro87@hotmail.com

<sup>7</sup> Faculty of Chemical Engineering, Universidade do Estado do Amazonas-UEA, Avenida Darcy Vargas N° 1200, Manaus 69050-020, Brazil; sjunior@uea.edu.br

<sup>8</sup> Graduate Program of Pharmaceutical Sciences, Campus Profissional-UFPA, Universidade Federal do Pará, Rua Corrêa N° 1, Belém 66075-900, Brazil; afaelquadros13@hotmail.com (A.R.Q.G.); martachagas2@yahoo.com.br (M.C.M.)

<sup>9</sup> Faculty of Pharmacy, Campus Profissional-UFPA, Universidade Federal do Pará, Rua Corrêa N° 1, Belém 66075-900, Brazil; victorcsricardo@gmail.com

\* Correspondence: machado@ufpa.br; Tel.: +55-91-984-620-325

**Table S1.** Classes of compounds, summation of peak areas, CAS number, and retention times of chemical compounds identified by CG-MS in bio-oil by pyrolysis of Açaí seeds (*Euterpe Oleracea*, Mart), activated with 2.0 M KOH solution, at 350 °C, 1.0 atmosphere, in laboratory scale.

| Class of Compounds: Chemical Compounds               | RT [min] | CAS        | i% (Area)     |
|------------------------------------------------------|----------|------------|---------------|
| <b>Alcohol</b>                                       |          |            |               |
| 2-Furanmethanol                                      | 8.251    | 98-00-0    | 1.576         |
| 5-tert-Butylpyrogallol                               | 28.208   | 20481-17-8 | 2.627         |
| $\Sigma$ (Area.%) =                                  |          |            | <b>4.203</b>  |
| <b>Aromatic</b>                                      |          |            |               |
| Naphthalene, 1,2-dihydro-6-methyl-                   | 21.820   | 2717-47-7  | 1.387         |
| Toluene                                              | 6.147    | 108-88-3   | 2.08          |
| Bicyclo[4.2.0]octa-1,3,5-triene                      | 9.714    | 694-87-1   | 1.701         |
| $\Sigma$ (Area.%) =                                  |          |            | <b>5.168</b>  |
| <b>Cresol</b>                                        |          |            |               |
| p-Cresol                                             | 14.651   | 106-44-5   | 3.266         |
| p-Cresol                                             | 15.304   | 106-44-5   | 3.349         |
| $\Sigma$ (Area.%) =                                  |          |            | <b>6.615</b>  |
| <b>Cycloalkene</b>                                   |          |            |               |
| Cyclooctene, 1,2-dimethyl-                           | 19.063   | 54299-96-6 | 3.163         |
| $\Sigma$ (Area.%) =                                  |          |            | <b>3.163</b>  |
| <b>Ester</b>                                         |          |            |               |
| 10-Octadecenoic acid, methyl ester                   | 42.716   | 13481-95-3 | 2.103         |
| Pentadecanoic acid, 13-methyl-, methyl ester         | 37.015   | 5487-50-3  | 1.733         |
| Tridecanoic acid, 12-methyl-, methyl ester           | 32.819   | 5129-58-8  | 1.576         |
| $\Sigma$ (Area.%) =                                  |          |            | <b>5.412</b>  |
| <b>Hetrocyclic organic compound</b>                  |          |            |               |
| 5H-1-Pyridine                                        | 22.420   | 270-91-7   | 2.222         |
| $\Sigma$ (Area.%) =                                  |          |            | <b>2.222</b>  |
| <b>Hydrocarbon</b>                                   |          |            |               |
| Cyclohexene, 3,3,5-trimethyl-                        | 16.265   | 503-45-7   | 1.855         |
| $\Sigma$ (Area.%) =                                  |          |            | <b>1.855</b>  |
| <b>Ketone</b>                                        |          |            |               |
| 2-Cyclopenten-1-one, 2,3-dimethyl-                   | 12.943   | 1121-05-7  | 1.933         |
| 2-Cyclopenten-1-one, 2,3-dimethyl-                   | 14.255   | 1121-05-7  | 1.632         |
| 2-Cyclopenten-1-one, 2-methyl-                       | 10.000   | 1120-73-6  | 1.726         |
| 2-Cyclopenten-1-one, 3,4,4-trimethyl-                | 14.995   | 30434-65-2 | 2.199         |
| 2-Pentanone, 4-hydroxy-4-methyl-                     | 7.901    | 123-42-2   | 3.034         |
| 5H-Inden-5-one, 1,2,3,6,7,7a-hexahydro-7a-methyl-    | 17.682   | 17299-55-7 | 1.685         |
| $\Sigma$ (Area.%) =                                  |          |            | <b>12.209</b> |
| <b>Lactonas</b>                                      |          |            |               |
| Butyrolactone                                        | 10.105   | 96-48-0    | 4.454         |
| $\Sigma$ (Area.%) =                                  |          |            | <b>4.454</b>  |
| <b>Phenol</b>                                        |          |            |               |
| 2,3-Dimethoxybenzyl alcohol                          | 26.227   | 5653-67-8  | 2.244         |
| Benzenemethanol, $\alpha$ -methyl- $\alpha$ -propyl- | 22.869   | 4383-18-0  | 1.64          |
| 1,3-Benzenediol, 4-ethyl-                            | 19.151   | 2896-60-8  | 4.524         |
| Phenol                                               | 12.168   | 108-95-2   | 15.640        |
| Phenol, 2,6-dimethoxy-                               | 23.679   | 91-10-1    | 4.014         |
| Phenol, 2-methoxy-                                   | 15.933   | 90-05-1    | 8.476         |

|                                         |        |            |                |
|-----------------------------------------|--------|------------|----------------|
| Phenol, 2-methoxy-4-propyl-             | 24.187 | 2785-87-7  | 1.846          |
| Phenol, 2-methoxy-5-(1-propenyl)-, (E)- | 26.524 | 19784-98-6 | 1.816          |
| Phenol, 3-ethyl-                        | 17.280 | 620-17-7   | 3.031          |
| Phenol, 3-ethyl-                        | 18.201 | 620-17-7   | 3.840          |
| Phenol, 3-ethyl-5-methyl-               | 20.410 | 698-71-5   | 1.672          |
| Phenol, 4-ethyl-2-methoxy-              | 21.680 | 2785-89-9  | 3.127          |
| $\Sigma$ (Area.%) =                     |        |            | <b>51.870</b>  |
| <b>Sesquiterpenes</b>                   |        |            |                |
| Cedran-diol, 8S,13-                     | 27.999 | 88588-48-1 | 2.828          |
| $\Sigma$ (Area.%) =                     |        |            | <b>2.828</b>   |
| <b>Total</b>                            |        |            | <b>100.000</b> |

**Table S2.** Classes of compounds, summation of peak areas, CAS number, and retention times of chemical compounds identified by CG-MS in bio-oil by pyrolysis of Açai seeds (*Euterpe Oleracea*, Mart), activated with 2.0 M KOH solution, at 400 °C, 1.0 atmosphere, in laboratory scale.

| Class of Compounds: Chemical Compounds                                       | RT [min] | CAS         | wi% (Area)   |
|------------------------------------------------------------------------------|----------|-------------|--------------|
| <b>Alcohol</b>                                                               |          |             |              |
| 1,1-Cyclopropanedimethanol, 2-methyl- $\alpha$ -phenyl-                      | 22.176   | 108546-96-9 | 1.814        |
| 2-Furanmethanol                                                              | 8.251    | 98-00-0     | 4.166        |
| $\Sigma$ (Area.%) =                                                          |          |             | <b>5.980</b> |
| <b>Alkane</b>                                                                |          |             |              |
| Decane                                                                       | 12.885   | 124-18-5    | 1.809        |
| Tridecane                                                                    | 22.076   | 629-50-5    | 2.433        |
| Undecane                                                                     | 16.079   | 1120-21-4   | 1.907        |
| $\Sigma$ (Area.%) =                                                          |          |             | <b>6.149</b> |
| <b>Amine</b>                                                                 |          |             |              |
| 4-(2,5-Dihydro-3-methoxyphenyl)butylamine                                    | 22.438   | 77515-67-4  | 2.888        |
| Phenethylamine, 2,4,5-trimethoxy- $\alpha$ -methyl-                          | 28.208   | 1083-09-6   | 1.974        |
| 2-Pentanone, 4-amino-4-methyl-                                               | 8.542    | 625-04-7    | 1.935        |
| $\Sigma$ (Area.%) =                                                          |          |             | <b>6.797</b> |
| <b>Aromatic</b>                                                              |          |             |              |
| Mesitylene                                                                   | 13.036   | 108-67-8    | 1.559        |
| Bicyclo[4.2.0]octa-1,3,5-triene                                              | 9.714    | 694-87-1    | 2.712        |
| $\Sigma$ (Area.%) =                                                          |          |             | <b>4.271</b> |
| <b>Carboxylic acid</b>                                                       |          |             |              |
| Butanoic acid, 4-hydroxy-                                                    | 10.104   | 591-81-1    | 2.144        |
| E-9-Tetradecenoic acid                                                       | 21.843   | 50286-30-1  | 3.189        |
| $\Sigma$ (Area.%) =                                                          |          |             | <b>5.333</b> |
| <b>Cresol</b>                                                                |          |             |              |
| p-Cresol                                                                     | 15.309   | 106-44-5    | 3.87         |
| $\Sigma$ (Area.%) =                                                          |          |             | <b>3.870</b> |
| <b>Cyclic alkene</b>                                                         |          |             |              |
| 1,3-Dimethyl-1-cyclohexene                                                   | 11.002   | 2808-76-6   | 0.902        |
| 1,5,5-Trimethyl-6-methylene-cyclohexene                                      | 18.981   | 514-95-4    | 1.862        |
| Cyclobutene, 2-propenylidene-                                                | 6.147    | 52097-85-5  | 2.140        |
| Cyclohexane                                                                  | 4.031    | 110-82-7    | 3.743        |
| $\Sigma$ (Area.%) =                                                          |          |             | <b>8.647</b> |
| <b>Ester</b>                                                                 |          |             |              |
| Acetic acid, 7-hydroxy-1,3,4,5,6,7-hexahydro-2H-naphthalen-4a-ylmethyl ester | 26.232   | -           | 1.824        |
| $\Sigma$ (Area.%) =                                                          |          |             | <b>1.824</b> |
| <b>Fatty Alcohol</b>                                                         |          |             |              |
| 1-Hexadecanol, 2-methyl-                                                     | 32.399   | 2490-48-4   | 1.708        |
| $\Sigma$ (Area.%) =                                                          |          |             | <b>1.708</b> |
| <b>Ketone</b>                                                                |          |             |              |
| 2-Cyclopenten-1-one, 2,3-dimethyl-                                           | 14.260   | 1121-05-7   | 2.845        |
| 2-Cyclopenten-1-one, 3,4,4-trimethyl-                                        | 14.995   | 30434-65-2  | 1.814        |
| 2-Pentanone, 4-hydroxy-4-methyl-                                             | 7.901    | 123-42-2    | 2.883        |
| Cyclopentanone, 2-ethyl-                                                     | 11.154   | 4971-18-0   | 1.291        |
| $\Sigma$ (Area.%) =                                                          |          |             | <b>8.833</b> |
| <b>Phenol</b>                                                                |          |             |              |

|                                |        |             |                |
|--------------------------------|--------|-------------|----------------|
| Phenol                         | 12.168 | 108-95-2    | 9.050          |
| Phenol, 2,3,5-trimethyl-       | 19.623 | 697-82-5    | 1.829          |
| Phenol, 2,4,6-trimethyl-       | 20.526 | 527-60-6    | 2.023          |
| Phenol, 2,4-dimethyl-          | 17.699 | 105-67-9    | 5.675          |
| Phenol, 2,6-dimethoxy-         | 23.679 | 91-10-1     | 2.919          |
| Phenol, 2-methoxy-             | 15.933 | 90-05-1     | 6.092          |
| Phenol, 2-methyl-              | 14.657 | 95-48-7     | 3.743          |
| Phenol, 3-ethyl-               | 17.280 | 620-17-7    | 3.115          |
| Phenol, 3-ethyl-               | 18.200 | 620-17-7    | 3.193          |
| Phenol, 4-ethyl-2-methoxy-     | 21.686 | 2785-89-9   | 3.612          |
| $\Sigma$ (Area.%) =            |        |             | <b>41.251</b>  |
| <b>Sequiterpenes</b>           |        |             |                |
| Tetradecane, 2,6,10-trimethyl- | 27.433 | 14905-56-7  | 1.990          |
| 1,4-Dihydrothujopsene-(II)     | 19.156 | 159087-74-8 | 3.346          |
| $\Sigma$ (Area.%) =            |        |             | <b>5.336</b>   |
| <b>Total</b>                   |        |             | <b>100.000</b> |

**Table S3.** Classes of compounds, summation of peak areas, CAS number, and retention times of chemical compounds identified by CG-MS in bio-oil by pyrolysis of Açaí seeds (*Euterpe Oleracea*, Mart), activated with 2.0 M KOH solution, at 450 °C, 1.0 atmosphere, in laboratory scale.

| Class of Compounds: Chemical Compounds                                           | RT [min] | CAS        | wi% (Area)   |
|----------------------------------------------------------------------------------|----------|------------|--------------|
| <b>Alcohol</b>                                                                   |          |            |              |
| 2,3,4,5,6-Pentamethyl benzyl alcohol                                             | 26.279   | -          | 1.738        |
| 2-Furanmethanol                                                                  | 8.257    | 98-00-0    | 1.578        |
| Benzenemethanol, $\alpha$ -ethyl-4-methoxy-                                      | 24.181   | 5349-60-0  | 1.805        |
| Cyclohexanol, 5-methyl-2-(1-methylethyl)-, (1 $\alpha$ ,2 $\alpha$ ,5 $\beta$ )- | 19.156   | 491-01-0   | 3.798        |
| $\Sigma$ (Area.%) =                                                              |          |            | <b>8.919</b> |
| <b>Alkane</b>                                                                    |          |            |              |
| Decane                                                                           | 12.891   | 124-18-5   | 1.234        |
| Nonadecane                                                                       | 27.433   | 629-92-5   | 1.518        |
| Tetradecane                                                                      | 24.833   | 629-59-4   | 2.332        |
| Tridecane                                                                        | 22.071   | 629-50-5   | 2.595        |
| Undecane                                                                         | 16.085   | 1120-21-4  | 1.590        |
| $\Sigma$ (Area.%) =                                                              |          |            | <b>9.269</b> |
| <b>Alkene</b>                                                                    |          |            |              |
| 7-Tetradecene                                                                    | 21.849   | 10374-74-0 | 2.863        |
| $\Sigma$ (Area.%) =                                                              |          |            | <b>2.863</b> |
| <b>Amine</b>                                                                     |          |            |              |
| 4-(2,5-Dihydro-3-methoxyphenyl)butylamine                                        | 22.438   | 77515-67-4 | 2.445        |
| $\Sigma$ (Area.%) =                                                              |          |            | <b>2.445</b> |
| <b>Armoatic</b>                                                                  |          |            |              |
| Bicyclo[4.2.0]octa-1,3,5-triene                                                  | 9.714    | 694-87-1   | 3.126        |
| Ethylbenzene                                                                     | 8.764    | 100-41-4   | 2.214        |
| Toluene                                                                          | 6.147    | 108-88-3   | 1.946        |
| $\Sigma$ (Area.%) =                                                              |          |            | <b>7.286</b> |
| <b>Carboxylic acid</b>                                                           |          |            |              |
| Butanoic acid, 4-hydroxy-                                                        | 10.105   | 591-81-1   | 0.973        |
| $\Sigma$ (Area.%) =                                                              |          |            | <b>0.973</b> |
| <b>Cresol</b>                                                                    |          |            |              |
| p-Cresol                                                                         | 15.304   | 106-44-5   | 3.004        |
| $\Sigma$ (Area.%) =                                                              |          |            | <b>3.004</b> |
| <b>Cyclic hydrocarbon</b>                                                        |          |            |              |
| 1,2,4,4-Tetramethylcyclopentene                                                  | 14.995   | 65378-76-9 | 1.302        |
| 1,3-Cyclopentadiene, 5-(1-methylpropylidene)-                                    | 13.025   | 04.02.3141 | 0.891        |
| Cyclohexane                                                                      | 4.025    | 110-82-7   | 3.245        |
| Cyclohexane, 1,2,4-tris(methylene)-                                              | 11.894   | 14296-81-2 | 0.856        |
| $\Sigma$ (Area.%) =                                                              |          |            | <b>6.294</b> |
| <b>Ester</b>                                                                     |          |            |              |
| Acetic acid, 7-hydroxy-1,3,4,5,6,7-hexahydro-2H-naphthalen-4a-ylmethyl ester     | 25.778   | -          | 1.287        |
| $\Sigma$ (Area.%) =                                                              |          |            | <b>1.287</b> |
| <b>Fatty Alcohol</b>                                                             |          |            |              |
| 1-Hexadecanol, 2-methyl-                                                         | 32.405   | 2490-48-4  | 1.508        |
| $\Sigma$ (Area.%) =                                                              |          |            | <b>1.508</b> |
| <b>Ketone</b>                                                                    |          |            |              |
| 2-Cyclopenten-1-one, 2,3-dimethyl-                                               | 14.260   | 1121-05-7  | 1.855        |

|                                                                     |        |             |                |
|---------------------------------------------------------------------|--------|-------------|----------------|
| 2-Cyclopenten-1-one, 2-methyl-                                      | 10.000 | 1120-73-6   | 0.904          |
| 4-(3,7,7-Trimethyl-2-oxabicyclo[3.2.0]hept-3-en-1-yl)but-3-en-2-one | 22.176 | 54686-00-9  | 1.449          |
| 4-(3,7,7-Trimethyl-2-oxabicyclo[3.2.0]hept-3-en-1-yl)but-3-en-2-one | 24.041 | 54686-00-9  | 1.567          |
| Spiro[2.3]hexan-5-one, 4,4-diethyl-                                 | 16.265 | -           | 1.293          |
| <b><math>\Sigma</math> (Area.%) =</b>                               |        |             | <b>7.068</b>   |
| <b>Nitrile</b>                                                      |        |             |                |
| Tricyclo[3.1.0.0(2,4)]hex-3-ene-3-carbonitrile                      | 12.681 | 103495-51-8 | 1.94           |
| <b><math>\Sigma</math> (Area.%) =</b>                               |        |             | <b>1.94</b>    |
| <b>Phenol</b>                                                       |        |             |                |
| Phenol                                                              | 12.168 | 108-95-2    | 5.731          |
| Phenol, 2,3,5-trimethyl-                                            | 20.514 | 697-82-5    | 1.967          |
|                                                                     | 16.586 | 526-75-0    | 1.369          |
| Phenol, 2,3-dimethyl-                                               | 17.693 | 526-75-0    | 4.757          |
| Phenol, 2,4,5-trimethyl-                                            | 21.406 | 496-78-6    | 1.684          |
| Phenol, 2,4,6-trimethyl-                                            | 19.617 | 527-60-6    | 1.752          |
| Phenol, 2,4,6-trimethyl-                                            | 21.523 | 527-60-6    | 1.504          |
| Phenol, 2,5-dimethyl-                                               | 18.643 | 95-87-4     | 1.234          |
| Phenol, 2,5-dimethyl-                                               | 18.982 | 95-87-4     | 1.964          |
| Phenol, 2,6-dimethoxy-                                              | 23.685 | 91-10-1     | 2.896          |
| Phenol, 2-ethyl-4-methyl-                                           | 21.004 | 3855-26-3   | 1.580          |
| Phenol, 2-methyl-                                                   | 14.657 | 95-48-7     | 2.594          |
| Phenol, 3,5-dimethyl-                                               | 18.305 | 108-68-9    | 1.785          |
| Phenol, 3-ethyl-                                                    | 18.206 | 620-17-7    | 2.602          |
| Phenol, 3-ethyl-5-methyl-                                           | 20.071 | 698-71-5    | 1.580          |
| Phenol, 4-ethyl-                                                    | 17.285 | 123-07-9    | 1.714          |
| Phenol, 4-ethyl-2-methoxy-                                          | 21.680 | 2785-89-9   | 2.935          |
| Phenol, 4-ethyl-2-methyl-                                           | 20.415 | 2219-73-0   | 1.683          |
| <b><math>\Sigma</math> (Area.%) =</b>                               |        |             | <b>41.331</b>  |
| <b>Terpenoid</b>                                                    |        |             |                |
| Ascaridole epoxide                                                  | 22.863 | 135760-25-7 | 2.28           |
| <b><math>\Sigma</math> (Area.%) =</b>                               |        |             | <b>2.28</b>    |
| <b>Non identified fraction</b>                                      |        |             |                |
| Mequinol                                                            | 15.933 | 150-76-5    | 3.532          |
| <b><math>\Sigma</math> (Area.%) =</b>                               |        |             | <b>3.532</b>   |
| <b>Total</b>                                                        |        |             | <b>100.000</b> |

**Table S4.** Classes of compounds, summation of peak areas, CAS number, and retention times of chemical compounds identified by CG-MS in aqueous phase by pyrolysis of Açaí seeds (*Euterpe Oleracea*, Mart), activated with 2.0 M KOH solution, at 350 °C, 1.0 atmosphere, in laboratory scale.

| Class of Compounds: Chemical Compounds     | RT [min] | CAS         | i% (Area)      |
|--------------------------------------------|----------|-------------|----------------|
| <b>Alcohol</b>                             |          |             |                |
| 2-Furanmethanol                            | 8.251    | 98-00-0     | 2.336          |
| $\Sigma$ (Area.%) =                        |          |             | <b>2.336</b>   |
| <b>Amine</b>                               |          |             |                |
| N-Isopropylcyclohexylamine                 | 18.422   | 1195-42-2   | 29.124         |
| $\Sigma$ (Area.%) =                        |          |             | <b>29.124</b>  |
| <b>Carboxylic acid</b>                     |          |             |                |
| Acetic acid, hydrazide                     | 3.851    | 1068-57-1   | 4.046          |
| $\Sigma$ (Area.%) =                        |          |             | <b>4.046</b>   |
| <b>Ketone</b>                              |          |             |                |
| 2-Pentanone, 4-amino-4-methyl-             | 8.543    | 625-04-7    | 15.919         |
| 2-Propanone, (1-methylethylidene)hydrazone | 8.700    | 627-70-3    | 15.122         |
| Butyrolactone                              | 10.111   | 96-48-0     | 3.132          |
| 1,2,3-Trimethylpiperidin-4-one             | 15.420   | -           | 14.578         |
| 4-Piperidinone, 2,2,6,6-tetramethyl-       | 16.907   | 826-36-8    | 4.06           |
| $\Sigma$ (Area.%) =                        |          |             | <b>52.811</b>  |
| <b>Oxazole</b>                             |          |             |                |
| Oxazole, 4,5-dihydro-2,4,4-trimethyl-      | 6.369    | 1772-43-6   | 3.524          |
| $\Sigma$ (Area.%) =                        |          |             | <b>3.524</b>   |
| <b>Phenol</b>                              |          |             |                |
| Phenol                                     | 12.191   | 108-95-2    | 4.452          |
| $\Sigma$ (Area.%) =                        |          |             | <b>4.452</b>   |
| <b>Silane</b>                              |          |             |                |
| (N-Methylcarbamoyloxymethyl)trivinylsilane | 7.319    | 120491-41-0 | 3.706          |
| $\Sigma$ (Area.%) =                        |          |             | <b>3.706</b>   |
| <b>Total</b>                               |          |             | <b>100.000</b> |



**Table S5:** Classes of compounds, summation of peak areas, CAS number, and retention times of chemical compounds identified by CG-MS in aqueous phase by pyrolysis of Açaí seeds (*Euterpe Oleracea*, Mart), activated with 2.0 M KOH solution, at 400 °C, 1.0 atmosphere, in laboratory scale.

| Class of Compounds: Chemical Compounds       | RT [min] | CAS        | wi% (Area)     |
|----------------------------------------------|----------|------------|----------------|
| <b>Alcohol</b>                               |          |            |                |
| 2-Furanmethanol                              | 8,257    | 98-00-0    | 15.587         |
| Cyclopropyl carbinol                         | 16.184   | 2516-33-8  | 5.148          |
| $\Sigma$ (Area.%) =                          |          |            | <b>20.735</b>  |
| <b>Amine</b>                                 |          |            |                |
| 2-Propen-1-amine, N,N-bis(1-methylethyl)-    | 15.420   | 44898-60-4 | 5.300          |
| $\Sigma$ (Area.%) =                          |          |            | <b>5.300</b>   |
| <b>Aziridin</b>                              |          |            |                |
| Aziridine, 1,2-diisopropyl-3-methyl-, trans- | 18.422   | 6124-84-1  | 3.490          |
| $\Sigma$ (Area.%) =                          |          |            | <b>3.490</b>   |
| <b>Carboxylic acid</b>                       |          |            |                |
| Butanoic acid, 4-hydroxy-                    | 10.110   | 591-81-1   | 15.020         |
| $\Sigma$ (Area.%) =                          |          |            | <b>15.020</b>  |
| <b>Ketone</b>                                |          |            |                |
| 2-Pentanone, 4-amino-4-methyl-               | 8.543    | 625-04-7   | 11.560         |
| 2-Propanone, (1-methylethylidene)hydrazone   | 8.694    | 627-70-3   | 3.550          |
| 4-Piperidinone, 2,2,6,6-tetramethyl-         | 16.895   | 826-36-8   | 4.585          |
| $\Sigma$ (Area.%) =                          |          |            | <b>19.695</b>  |
| <b>Oxazole</b>                               |          |            |                |
| Oxazole, 4,5-dihydro-2,4,4-trimethyl-        | 6.374    | 1772-43-6  | 32.78          |
| 5-Amino-3,4-dimethyl-isoxazole               | 7.319    | 19947-75-2 | 2.980          |
| $\Sigma$ (Area.%) =                          |          |            | <b>35.76</b>   |
| <b>Total</b>                                 |          |            | <b>100.000</b> |

**Table S6:** Classes of compounds, summation of peak areas, CAS number, and retention times of chemical compounds identified by CG-MS in aqueous phase by pyrolysis of Açaí seeds (*Euterpe Oleracea*, Mart), activated with 2.0 M KOH solution, at 450 °C, 1.0 atmosphere, in laboratory scale.

| Class of Compounds: Chemical Compounds                     | RT [min] | CAS        | wi% (Area)     |
|------------------------------------------------------------|----------|------------|----------------|
| <b>Alcohol</b>                                             |          |            |                |
| 2,4-Dimethyl-2-oxazoline-4-methanol                        | 6.368    | 39986-37-3 | 17.670         |
| 3-Furanmethanol                                            | 8.257    | 4412-91-3  | 8.948          |
| $\Sigma$ (Area.%) =                                        |          |            | <b>26.618</b>  |
| <b>Alkene</b>                                              |          |            |                |
| 2-Pentene, 2,4-dimethyl-                                   | 6.735    | 625-65-0   | 3.394          |
| $\Sigma$ (Area.%) =                                        |          |            | <b>3.394</b>   |
| <b>Amine</b>                                               |          |            |                |
| N-Tert.-butyl-N-(2-propenyl)amine                          | 13.030   | 16486-68-3 | 6.054          |
| 2-Propen-1-amine, N,N-bis(1-methylethyl)-                  | 15.426   | 44898-60-4 | 3.620          |
| $\Sigma$ (Area.%) =                                        |          |            | <b>9.674</b>   |
| <b>Aziridine</b>                                           |          |            |                |
| Aziridine, 2-(1,1-dimethylethyl)-1-ethyl-3-methyl-, trans- | 18.416   | 55669-79-9 | 3.381          |
| $\Sigma$ (Area.%) =                                        |          |            | <b>3.381</b>   |
| <b>Carboxylic acid</b>                                     |          |            |                |
| Butanedioic acid, methylene-                               | 7.313    | 97-65-4    | 2.487          |
| Butanoic acid, 4-hydroxy-                                  | 10.104   | 591-81-1   | 6.743          |
| $\Sigma$ (Area.%) =                                        |          |            | <b>9.230</b>   |
| <b>Ester</b>                                               |          |            |                |
| Carbamic acid, phenyl ester                                | 12.191   | 622-46-8   | 3.316          |
| $\Sigma$ (Area.%) =                                        |          |            | <b>3.316</b>   |
| <b>Ketone</b>                                              |          |            |                |
| 2-Pentanone, 4-amino-4-methyl-                             | 8.531    | 625-04-7   | 32.541         |
| 2-Propanone, (1-methylethylidene)hydrazone                 | 8.700    | 627-70-3   | 2.292          |
| 4-Piperidinone, 2,2,6,6-tetramethyl-                       | 16.901   | 826-36-8   | 9.553          |
| $\Sigma$ (Area.%) =                                        |          |            | <b>44.386</b>  |
| <b>Total</b>                                               |          |            | <b>100.000</b> |

**Table S7.** Classes of compounds, summation of peak areas, CAS number, and retention times of chemical compounds identified by CG-MS in bio-oil by pyrolysis of Açai seeds (*Euterpe Oleracea*, Mart), activated with 0.5 M KOH solution, at 450 °C, 1.0 atmosphere, in laboratory scale.

| Class of Compounds: Chemical Compounds                        | RT [min] | CAS        | wi% (Area)    |
|---------------------------------------------------------------|----------|------------|---------------|
| <b>Alcohol</b>                                                |          |            |               |
| 2-Furanmethanol                                               | 8.251    | 98-00-0    | 9.136         |
| 2-Furanmethanol, acetate                                      | 12.570   | 623-17-6   | 1.110         |
| Maltol                                                        | 16.662   | 118-71-8   | 1.577         |
| 4-Methoxybenzene-1,2-diol                                     | 21.249   | 3934-97-2  | 1.169         |
| Resorcinol, 2-acetyl-                                         | 21.890   | 699-83-2   | 1.978         |
| 5-tert-Butylpyrogallol                                        | 28.208   | 20481-17-8 | 1.788         |
| $\Sigma$ (Area.%) =                                           |          |            | <b>16.758</b> |
| <b>Aldehyde</b>                                               |          |            |               |
| 1-Cyclohexene-1-carboxaldehyde, 4-(1-methylethyl)-            | 14.989   | 21391-98-0 | 1.719         |
| Dodecanal                                                     | 16.143   | 112-54-9   | 1.118         |
| $\Sigma$ (Area.%) =                                           |          |            | <b>2.837</b>  |
| <b>Aromatic hydrocarbon</b>                                   |          |            |               |
| Ethylbenzene                                                  | 8.764    | 100-41-4   | 1.176         |
| Styrene                                                       | 9.720    | 100-42-5   | 1.087         |
| Toluene                                                       | 6.147    | 108-88-3   | 1.703         |
| $\Sigma$ (Area.%) =                                           |          |            | <b>3.966</b>  |
| <b>Azole</b>                                                  |          |            |               |
| Oxazole, 4,5-dihydro-2,4,4-trimethyl-                         | 6.374    | 1772-43-6  | 0.951         |
| $\Sigma$ (Area.%) =                                           |          |            | <b>0.951</b>  |
| <b>Carboxylic acid</b>                                        |          |            |               |
| 9-Hexadecenoic acid                                           | 38.391   | 2091-29-4  | 2.180         |
| Benzoic acid                                                  | 17.973   | 65-85-0    | 2.058         |
| cis-2-Methoxycinnamic acid                                    | 25.720   | 14737-91-8 | 1.672         |
| Dodecanoic acid                                               | 28.838   | 143-07-7   | 5.043         |
| Tetradecanoic acid                                            | 33.431   | 544-63-8   | 1.540         |
| $\Sigma$ (Area.%) =                                           |          |            | <b>12.493</b> |
| <b>Coumarin</b>                                               |          |            |               |
| Comarin, 3,4,4a,5,6,8a-hexahydro-6,8a-epidioxy-4a,6-dimethyl- | 27.439   | -          | 1.454         |
| $\Sigma$ (Area.%) =                                           |          |            | <b>1.454</b>  |
| <b>Cyclic hydrocarbon</b>                                     |          |            |               |
| Cyclohexane                                                   | 4.025    | 110-82-7   | 1.700         |
| $\Sigma$ (Area.%) =                                           |          |            | <b>1.700</b>  |
| <b>Ester</b>                                                  |          |            |               |
| Benzoic acid, methyl ester                                    | 16.242   | 93-58-3    | 1.422         |
| Methyl tetradecanoate                                         | 32.813   | 124-10-7   | 0.969         |
| $\Sigma$ (Area.%) =                                           |          |            | <b>2.391</b>  |
| <b>Furan</b>                                                  |          |            |               |
| Furan, 2-(2-furanylmethyl)-5-methyl-                          | 18.579   | 13678-51-8 | 1.294         |
| $\Sigma$ (Area.%) =                                           |          |            | <b>1.294</b>  |
| <b>Ketone</b>                                                 |          |            |               |
| 1H-Inden-1-one, 2,3-dihydro-                                  | 22.164   | 83-33-0    | 0.951         |
| 2-Cyclopenten-1-one                                           | 7.779    | 930-30-3   | 0.971         |
| 2-Cyclopenten-1-one, 2,3-dimethyl-                            | 14.260   | 1121-05-7  | 1.319         |

|                                                                                                     |        |            |                |
|-----------------------------------------------------------------------------------------------------|--------|------------|----------------|
| 2-Cyclopenten-1-one, 2-methyl-                                                                      | 10.000 | 1120-73-6  | 1.155          |
| 2-Cyclopenten-1-one, 2-methyl-                                                                      | 11.894 | 1120-73-6  | 0.970          |
| 2-Cyclopenten-1-one, 3-ethyl-2-hydroxy-                                                             | 16.790 | 21835-01-8 | 1.503          |
| 3H-Cyclodeca[b]furan-2-one, 4,9-dihydroxy-6-methyl-3,10di-methylene-3a,4,7,8,9,10,11,11a-octahydro- | 37.977 | -          | 1.140          |
| 3-Methylcyclopentane-1,2-dione                                                                      | 13.800 | -          | 2.273          |
| Ethanone, 1-(2-furanyl)-                                                                            | 10.105 | 1192-62-7  | 3.283          |
| $\Sigma$ (Area.%) =                                                                                 |        |            | <b>10.673</b>  |
| <b>Nitrile</b>                                                                                      |        |            |                |
| Benzonitrile                                                                                        | 12.675 | 100-47-0   | 1.264          |
| $\Sigma$ (Area.%) =                                                                                 |        |            | <b>1.264</b>   |
| <b>Phenol</b>                                                                                       |        |            |                |
| (E)-2,6-Dimethoxy-4-(prop-1-en-1-yl)phenol                                                          | 32.638 | 20675-95-0 | 1.928          |
| 2-Methoxy-4-vinylphenol                                                                             | 22.770 | 7786-61-0  | 2.220          |
| Benzenemethanol, 4-hydroxy-                                                                         | 23.411 | 623-05-2   | 1.013          |
| Creosol                                                                                             | 19.157 | 93-51-6    | 1.936          |
| Phenol                                                                                              | 12.162 | 108-95-2   | 9.484          |
| Phenol, 2,5-dimethyl-                                                                               | 17.699 | 95-87-4    | 1.069          |
| Phenol, 2,6-dimethoxy-                                                                              | 23.680 | 91-10-1    | 3.618          |
| Phenol, 2-methoxy-                                                                                  | 15.933 | 90-05-1    | 4.298          |
| Phenol, 2-methoxy-4-(1-propenyl)-                                                                   | 26.512 | 97-54-1    | 2.293          |
| Phenol, 2-methyl-                                                                                   | 14.657 | 95-48-7    | 1.774          |
| Phenol, 3-ethoxy-                                                                                   | 19.022 | 621-34-1   | 1.620          |
| Phenol, 3-ethyl-                                                                                    | 17.291 | 620-17-7   | 0.996          |
| Phenol, 3-ethyl-                                                                                    | 18.206 | 620-17-7   | 1.867          |
| Phenol, 3-methyl-                                                                                   | 15.310 | 108-39-4   | 1.336          |
| Phenol, 4-ethyl-2-methoxy-                                                                          | 21.675 | 2785-89-9  | 2.717          |
| Phenol, 4-methoxy-3-(methoxymethyl)-                                                                | 26.215 | 59907-65-2 | 1.336          |
| $\Sigma$ (Area.%) =                                                                                 |        |            | <b>40.335</b>  |
| <b>Non-identified Fraction</b>                                                                      |        |            | <b>3.884</b>   |
| <b>Total</b>                                                                                        |        |            | <b>100.000</b> |

**Table S8.** Classes of compounds, summation of peak areas, CAS number, and retention times of chemical compounds identified by CG-MS in bio-oil by pyrolysis of Açaí seeds (*Euterpe Oleracea*, Mart), activated with 1.0 M KOH solution, at 450 °C, 1.0 atmosphere, in laboratory scale.

| Class of Compounds: Chemical Compounds                  | RT [min] | CAS         | wi% (Area)    |
|---------------------------------------------------------|----------|-------------|---------------|
| <b>Alcohol</b>                                          |          |             |               |
| 2-Furanmethanol                                         | 8.251    | 98-00-0     | 4.571         |
| p-Cresol                                                | 15.309   | 106-44-5    | 3.681         |
| 1,3-Benzenediol, 4-ethyl-                               | 19.156   | 2896-60-8   | 2.872         |
| 6-Methyl-cyclodec-5-enol                                | 19.588   | -           | 1.240         |
| 1,1-Cyclopropanedimethanol, 2-methyl- $\alpha$ -phenyl- | 22.164   | 108546-96-9 | 1.308         |
| 5-tert-Butylpyrogallol                                  | 28.202   | 20481-17-8  | 1.487         |
| Octahydro-anthracen-2,3,4a,6,7,8a,9a,10a-octaol         | 28.844   | -           | 1.064         |
| Estra-1,3,5(10)-trien-17 $\beta$ -ol                    | 33.437   | 2529-64-8   | 3.928         |
| $\Sigma$ (Area.%) =                                     |          |             | <b>20.151</b> |
| <b>Aldehyde</b>                                         |          |             |               |
| Cyclopentanecarboxaldehyde, 2-methyl-3-methylene-       | 16.254   | -           | 1.278         |
| $\Sigma$ (Area.%) =                                     |          |             | <b>1.278</b>  |
| <b>Alkane</b>                                           |          |             |               |
| Cyclohexane                                             | 4.025    | 110-82-7    | 2.588         |
| Tridecane                                               | 22.071   | 629-50-5    | 1.047         |
| $\Sigma$ (Area.%) =                                     |          |             | <b>3.635</b>  |
| <b>Alkene</b>                                           |          |             |               |
| Bicyclo[4.2.0]octa-1,3,5-triene                         | 9.720    | 694-87-     | 2.261         |
| $\Sigma$ (Area.%) =                                     |          |             | <b>2.261</b>  |
| <b>Aromatic hydrocarbon</b>                             |          |             |               |
| Toluene                                                 | 6.147    | 108-88-3    | 1.675         |
| Benzene, 1,3-dimethyl-                                  | 8.764    | 108-38-3    | 1.752         |
| $\Sigma$ (Area.%) =                                     |          |             | <b>3.427</b>  |
| <b>Carboxylic acid</b>                                  |          |             |               |
| Palmitoleic acid                                        | 21.849   | 373-49-9    | 1.583         |
| Oxiraneoctanoic acid, 3-octyl-, cis-                    | 27.241   | 24560-98-3  | 1.025         |
| 9-Hexadecenoic acid                                     | 38.391   | 2091-29-4   | 0.937         |
| $\Sigma$ (Area.%) =                                     |          |             | <b>3.545</b>  |
| <b>Ester</b>                                            |          |             |               |
| Butyrolactone                                           | 10.110   | 96-48-0     | 2.459         |
| Methyl 4,6-tetradecadiynoate                            | 25.084   | -           | 0.895         |
| Geranyl isovalerate                                     | 27.433   | 109-20-6    | 0.988         |
| Methyl tetradecanoate                                   | 32.819   | 124-10-7    | 1.249         |
| Pentadecanoic acid, 13-methyl-, methyl ester            | 37.021   | 5487-50-3   | 1.331         |
| 10-Octadecenoic acid, methyl ester                      | 42.71    | -           | 1.046         |
| $\Sigma$ (Area.%) =                                     |          |             | <b>8.830</b>  |
| <b>Furan</b>                                            |          |             |               |
| 2,4-Dimethylfuran                                       | 11.888   | 3710-43-8   | 1.139         |
| $\Sigma$ (Area.%) =                                     |          |             | <b>1.139</b>  |
| <b>Ketone</b>                                           |          |             |               |
| 2-Cyclopenten-1-one, 2-methyl-                          | 9.994    | 1120-73-6   | 1.028         |
| 2-Furanmethanol, acetate                                | 12.570   | 623-17-6    | 0.984         |
| 2-Cyclopenten-1-one, 2,3-dimethyl-                      | 12.943   | 1121-05-7   | 0.909         |

|                                                                                              |        |            |                |
|----------------------------------------------------------------------------------------------|--------|------------|----------------|
| 2-Cyclopenten-1-one, 2-hydroxy-3-methyl-                                                     | 13.800 | 80-71-7    | 1.133          |
| 2-Cyclopenten-1-one, 2,3-dimethyl-                                                           | 14.260 | 1121-05-7  | 1.712          |
| 2-Cyclopenten-1-one, 3,4,4-trimethyl-                                                        | 14.989 | 30434-65-2 | 1.058          |
| 2-Cyclopenten-1-one, 3-ethyl-2-hydroxy-                                                      | 16.796 | 21835-01-8 | 1.549          |
| Cyclohexanone, 2-(2-butynyl)-                                                                | 22.508 | 54166-48-2 | 1.861          |
| Cyclopenta[1,3]cyclopropa[1,2]cyclohepten-3(3aH)-one,<br>1,2,3b,6,7,8hexahydro-6,6-dimethyl- | 25.772 | 91531-58-7 | 1.045          |
| <b><math>\Sigma</math> (Area.%) =</b>                                                        |        |            | <b>11.279</b>  |
| <b>Phenol</b>                                                                                |        |            |                |
| Phenol                                                                                       | 12.168 | 108-95-2   | 8.939          |
| Phenol, 2-methyl-                                                                            | 14.651 | 95-48-7    | 2.971          |
| Phenol, 2-methoxy-                                                                           | 15.933 | 90-05-1    | 5.262          |
| Phenol, 2,5-dimethyl-                                                                        | 16.592 | 95-87-4    | 1.292          |
| Phenol, 3-ethyl-                                                                             | 17.285 | 620-17-7   | 2.110          |
| Phenol, 2,5-dimethyl-                                                                        | 17.693 | 95-87-4    | 3.871          |
| Phenol, 3-ethyl-                                                                             | 18.200 | 620-17-7   | 2.298          |
| Phenol, 2-ethyl-6-methyl-                                                                    | 18.981 | 1687-64-5  | 1.298          |
| Phenol, 3-ethyl-5-methyl-                                                                    | 20.066 | 698-71-5   | 1.027          |
| Phenol, 2-ethyl-4-methyl-                                                                    | 20.998 | 3855-26-3  | 1.324          |
| Phenol, 2,4,6-trimethyl-                                                                     | 21.412 | 527-60-6   | 0.947          |
| Phenol, 2,4,6-trimethyl-                                                                     | 21.523 | 527-60-6   | 1.046          |
| Phenol, 4-ethyl-2-methoxy-                                                                   | 21.680 | 2785-89-9  | 2.349          |
| 2-Methoxy-4-vinylphenol                                                                      | 22.770 | 7786-61-0  | 1.369          |
| Phenol, 2,6-dimethoxy-                                                                       | 23.679 | 91-10-1    | 3.089          |
| Benzenemethanol, $\alpha$ -ethyl-4-methoxy-                                                  | 24.181 | 5349-60-0  | 1.122          |
| 2,3-Dimethoxybenzyl alcohol                                                                  | 26.221 | 5653-67-8  | 1.831          |
| 3-Allyl-6-methoxyphenol                                                                      | 26.512 | 501-19-9   | 1.143          |
| (E)-2,6-Dimethoxy-4-(prop-1-en-1-yl)phenol                                                   | 32.638 | 20675-95-0 | 1.167          |
| <b><math>\Sigma</math> (Area.%) =</b>                                                        |        |            | <b>44.455</b>  |
| <b>Total</b>                                                                                 |        |            | <b>100.000</b> |
